# Supplementary material for: Sympatric Populations of the Anopheles gambiae Complex in Southwest Burkina Faso Evolve Multiple Diverse Resistance Mechanisms in Response to Intense Selection Pressure with Pyrethroids
Source: MDPI journal article supplement (doi:10.3390/insects13030247), 2022-02-28
Supplement: s1 [file s1]

# GO Biological Process

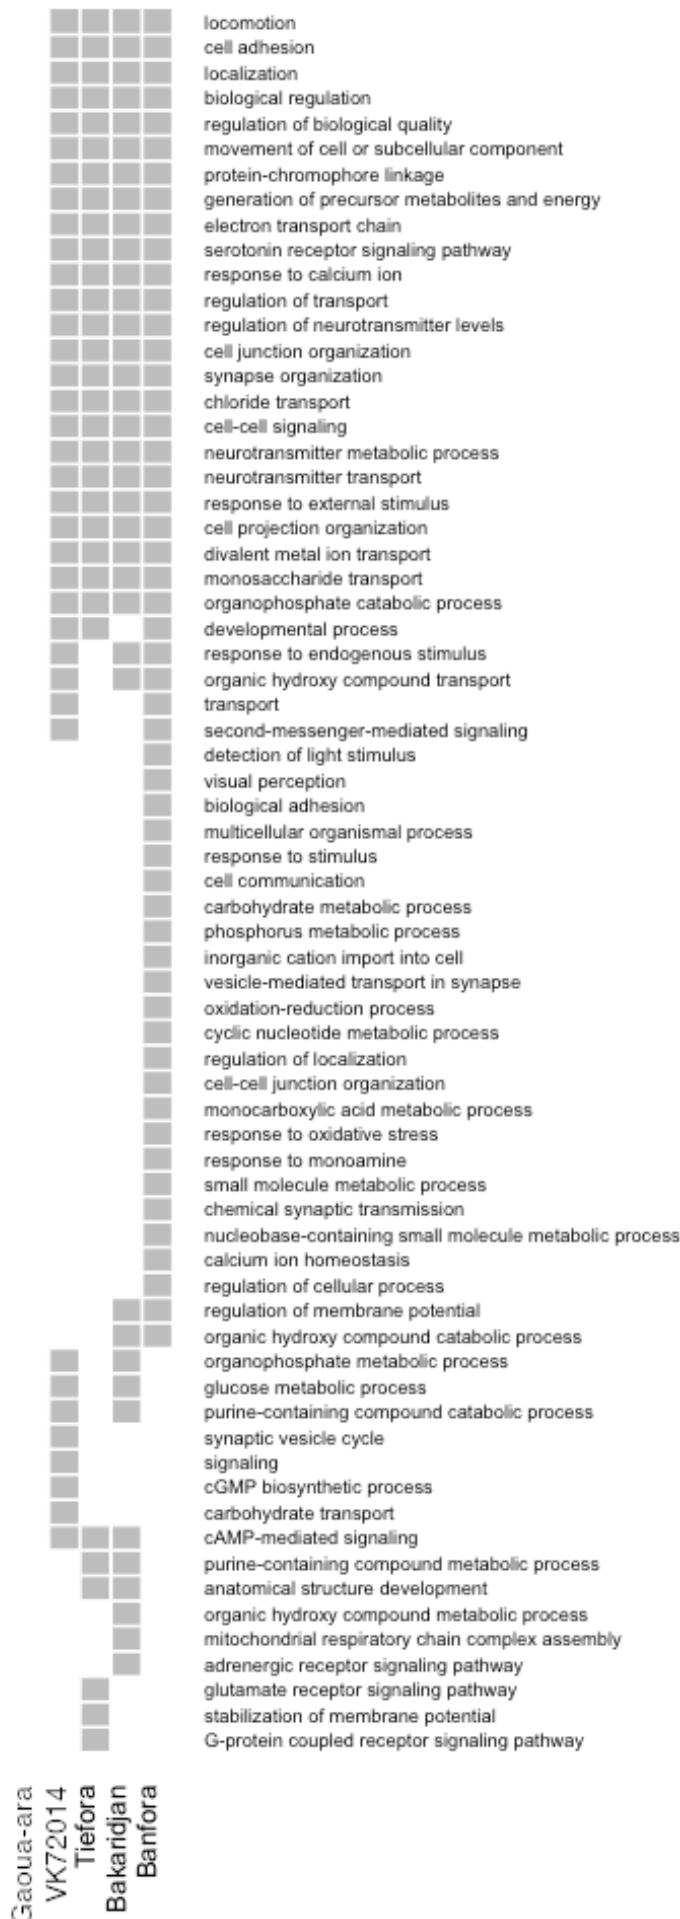

# GO Cellular Component

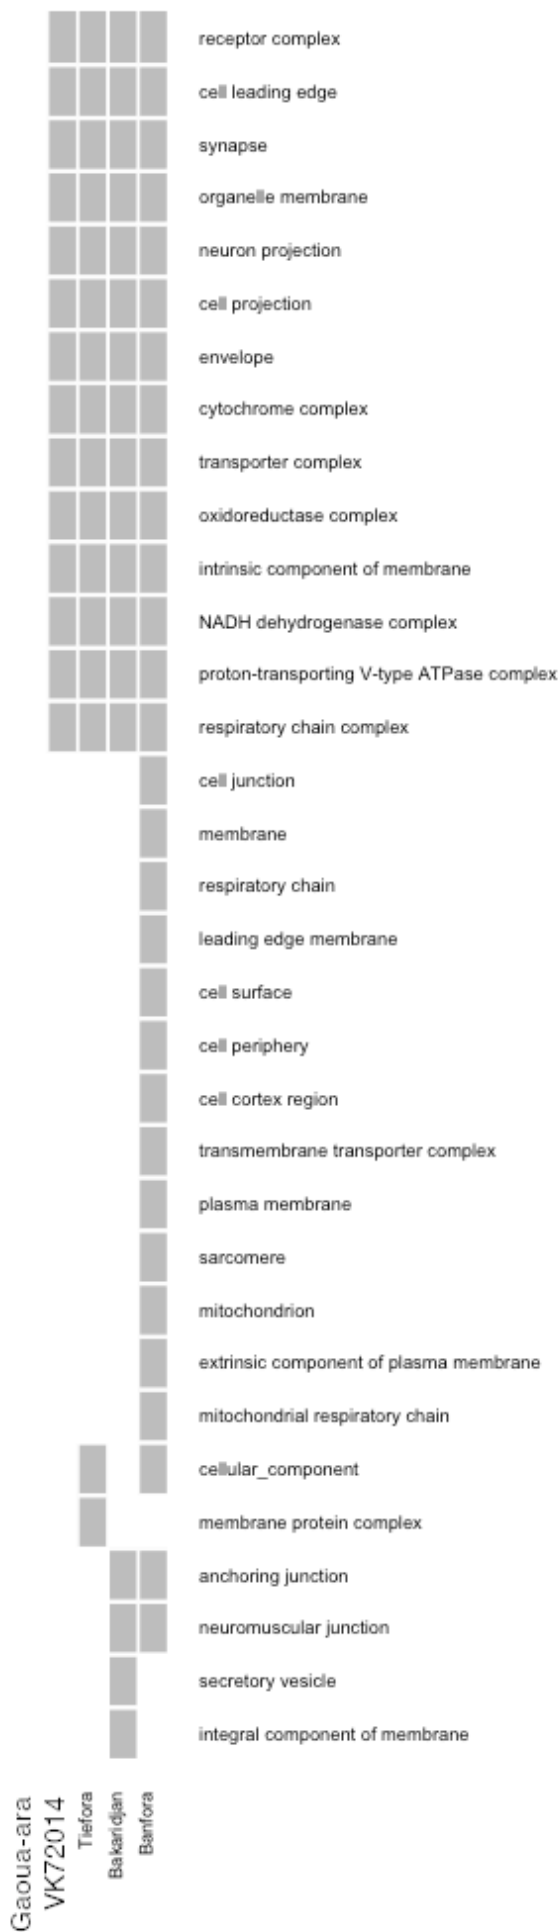

|                                                                          | Gaoua-ara | VK72014 | Tiefora | Bakaridjan | Banfora |
|--------------------------------------------------------------------------|-----------|---------|---------|------------|---------|
| catalytic activity                                                       |           |         |         |            |         |
| G-protein coupled receptor activity                                      |           |         |         |            |         |
| calcium-dependent cysteine-type endopeptidase activity                   |           |         |         |            |         |
| phosphorus-oxygen lyase activity                                         |           |         |         |            |         |
| UDP-glycosyltransferase activity                                         |           |         |         |            |         |
| phosphotransferase activity, phosphate group as acceptor                 |           |         |         |            |         |
| transmitter-gated channel activity                                       |           |         |         |            |         |
| hydrogen-translocating pyrophosphatase activity                          |           |         |         |            |         |
| active transmembrane transporter activity                                |           |         |         |            |         |
| hormone activity                                                         |           |         |         |            |         |
| ATP binding                                                              |           |         |         |            |         |
| calcium ion transmembrane transporter activity                           |           |         |         |            |         |
| receptor activator activity                                              |           |         |         |            |         |
| carbohydrate transmembrane transporter activity                          |           |         |         |            |         |
| receptor regulator activity                                              |           |         |         |            |         |
| transcription factor activity, sequence-specific DNA binding             |           |         |         |            |         |
| oxidoreductase activity, acting on a heme group of donors                |           |         |         |            |         |
| SNARE binding                                                            |           |         |         |            |         |
| guanylate cyclase activity                                               |           |         |         |            |         |
| binding                                                                  |           |         |         |            |         |
| molecular_function                                                       |           |         |         |            |         |
| electron carrier activity                                                |           |         |         |            |         |
| intramolecular oxidoreductase activity                                   |           |         |         |            |         |
| calcium ion binding                                                      |           |         |         |            |         |
| voltage-gated channel activity                                           |           |         |         |            |         |
| oxidoreductase activity, incorporation or reduction of molecular oxygen  |           |         |         |            |         |
| passive transmembrane transporter activity                               |           |         |         |            |         |
| ion transmembrane transporter activity                                   |           |         |         |            |         |
| cadherin binding                                                         |           |         |         |            |         |
| oxidoreductase activity, acting on NAD(P)H                               |           |         |         |            |         |
| neuropeptide receptor activity                                           |           |         |         |            |         |
| octopamine receptor activity                                             |           |         |         |            |         |
| nucleotidase activity                                                    |           |         |         |            |         |
| neurotransmitter transporter activity                                    |           |         |         |            |         |
| oxidoreductase activity                                                  |           |         |         |            |         |
| transporter activity                                                     |           |         |         |            |         |
| heme binding                                                             |           |         |         |            |         |
| hydrolase activity                                                       |           |         |         |            |         |
| phosphatidylserine binding                                               |           |         |         |            |         |
| tetrapyrrole binding                                                     |           |         |         |            |         |
| phosphoric ester hydrolase activity                                      |           |         |         |            |         |
| nucleoside phosphate binding                                             |           |         |         |            |         |
| kinase activity                                                          |           |         |         |            |         |
| anion binding                                                            |           |         |         |            |         |
| leak channel activity                                                    |           |         |         |            |         |
| oxidoreductase activity, acting on diphenols, cytochrome as acceptor     |           |         |         |            |         |
| inorganic solute uptake transmembrane transporter activity               |           |         |         |            |         |
| ion channel activity                                                     |           |         |         |            |         |
| oxidoreductase activity, heme group of donors, oxygen as acceptor        |           |         |         |            |         |
| transferase activity, transferring phosphorus-containing groups          |           |         |         |            |         |
| alpha-actinin binding                                                    |           |         |         |            |         |
| neurotransmitter receptor activity, regulation of postsynaptic potential |           |         |         |            |         |
| monooxygenase activity                                                   |           |         |         |            |         |
| cell adhesion molecule binding                                           |           |         |         |            |         |
| hydrogen ion channel activity                                            |           |         |         |            |         |
| NADH dehydrogenase (ubiquinone) activity                                 |           |         |         |            |         |
| molecular function regulator                                             |           |         |         |            |         |
| protein binding                                                          |           |         |         |            |         |
| Rac GTPase binding                                                       |           |         |         |            |         |
| small molecule binding                                                   |           |         |         |            |         |
| hormone binding                                                          |           |         |         |            |         |
| G-protein coupled photoreceptor activity                                 |           |         |         |            |         |
| molecular transducer activity                                            |           |         |         |            |         |
| oxidoreductase activity, diphenols and related substances as donors      |           |         |         |            |         |
| carbohydrate derivative binding                                          |           |         |         |            |         |
| sequence-specific DNA binding                                            |           |         |         |            |         |
| ion binding                                                              |           |         |         |            |         |
| heme-copper terminal oxidase activity                                    |           |         |         |            |         |
| syntxin binding                                                          |           |         |         |            |         |
| iron ion binding                                                         |           |         |         |            |         |
| clathrin binding                                                         |           |         |         |            |         |
| serotonin receptor activity                                              |           |         |         |            |         |
| receptor binding                                                         |           |         |         |            |         |
| dipeptidase activity                                                     |           |         |         |            |         |
| cyclase activity                                                         |           |         |         |            |         |
| narrow pore channel activity                                             |           |         |         |            |         |

# Other Pathways

|  |                                              |
|--|----------------------------------------------|
|  | Arachidonic acid metabolism                  |
|  | Alanine, aspartate and glutamate metabolism  |
|  | Autophagy - animal                           |
|  | Circadian rhythm - fly                       |
|  | Cuticular Hydrocarbon Synthesis              |
|  | Endocytosis                                  |
|  | Ether lipid metabolism                       |
|  | FoxO signaling pathway                       |
|  | Glycerolipid metabolism                      |
|  | Glyoxylate and dicarboxylate metabolism      |
|  | Hedgehog signaling pathway - fly             |
|  | Hexamerin                                    |
|  | Hippo                                        |
|  | Hippo signaling pathway - fly                |
|  | JAK                                          |
|  | Linoleic acid metabolism                     |
|  | MAPK signaling pathway - fly                 |
|  | Notch signaling pathway                      |
|  | Phosphonate and phosphinate metabolism       |
|  | Polarity                                     |
|  | Starch and sucrose metabolism                |
|  | TGF-beta signaling pathway                   |
|  | Metabolic pathways                           |
|  | Carbon metabolism                            |
|  | Mitochondria chain                           |
|  | Citrate cycle (TCA cycle)                    |
|  | Oxidative phosphorylation                    |
|  | Phagosome                                    |
|  | TCA                                          |
|  | OBPs                                         |
|  | Phosphatidylinositol signaling system        |
|  | Drug metabolism - cytochrome P450            |
|  | Ascorbate and aldarate metabolism            |
|  | Metabolism of xenobiotics by cytochrome P450 |
|  | Pentose and glucuronate interconversions     |
|  | Purine metabolism                            |
|  | Putative Transcription Factors               |
|  | Retinol metabolism                           |
|  | Nicotinate and nicotinamide metabolism       |
|  | ABCs                                         |
|  | P450s                                        |
|  | Inositol phosphate metabolism                |
|  | Drug metabolism - other enzymes              |
|  | Glycerophospholipid metabolism               |
|  | Neuroactive ligand-receptor interaction      |
|  | GSTsCOEsUDPs                                 |
|  | Fructose and mannose metabolism              |
