# Supplementary figures and images for: Sympatric Populations of the Anopheles gambiae Complex in Southwest Burkina Faso Evolve Multiple Diverse Resistance Mechanisms in Response to Intense Selection Pressure with Pyrethroids
Source: MDPI journal article supplement (doi:10.3390/insects13030247), 2022-02-28

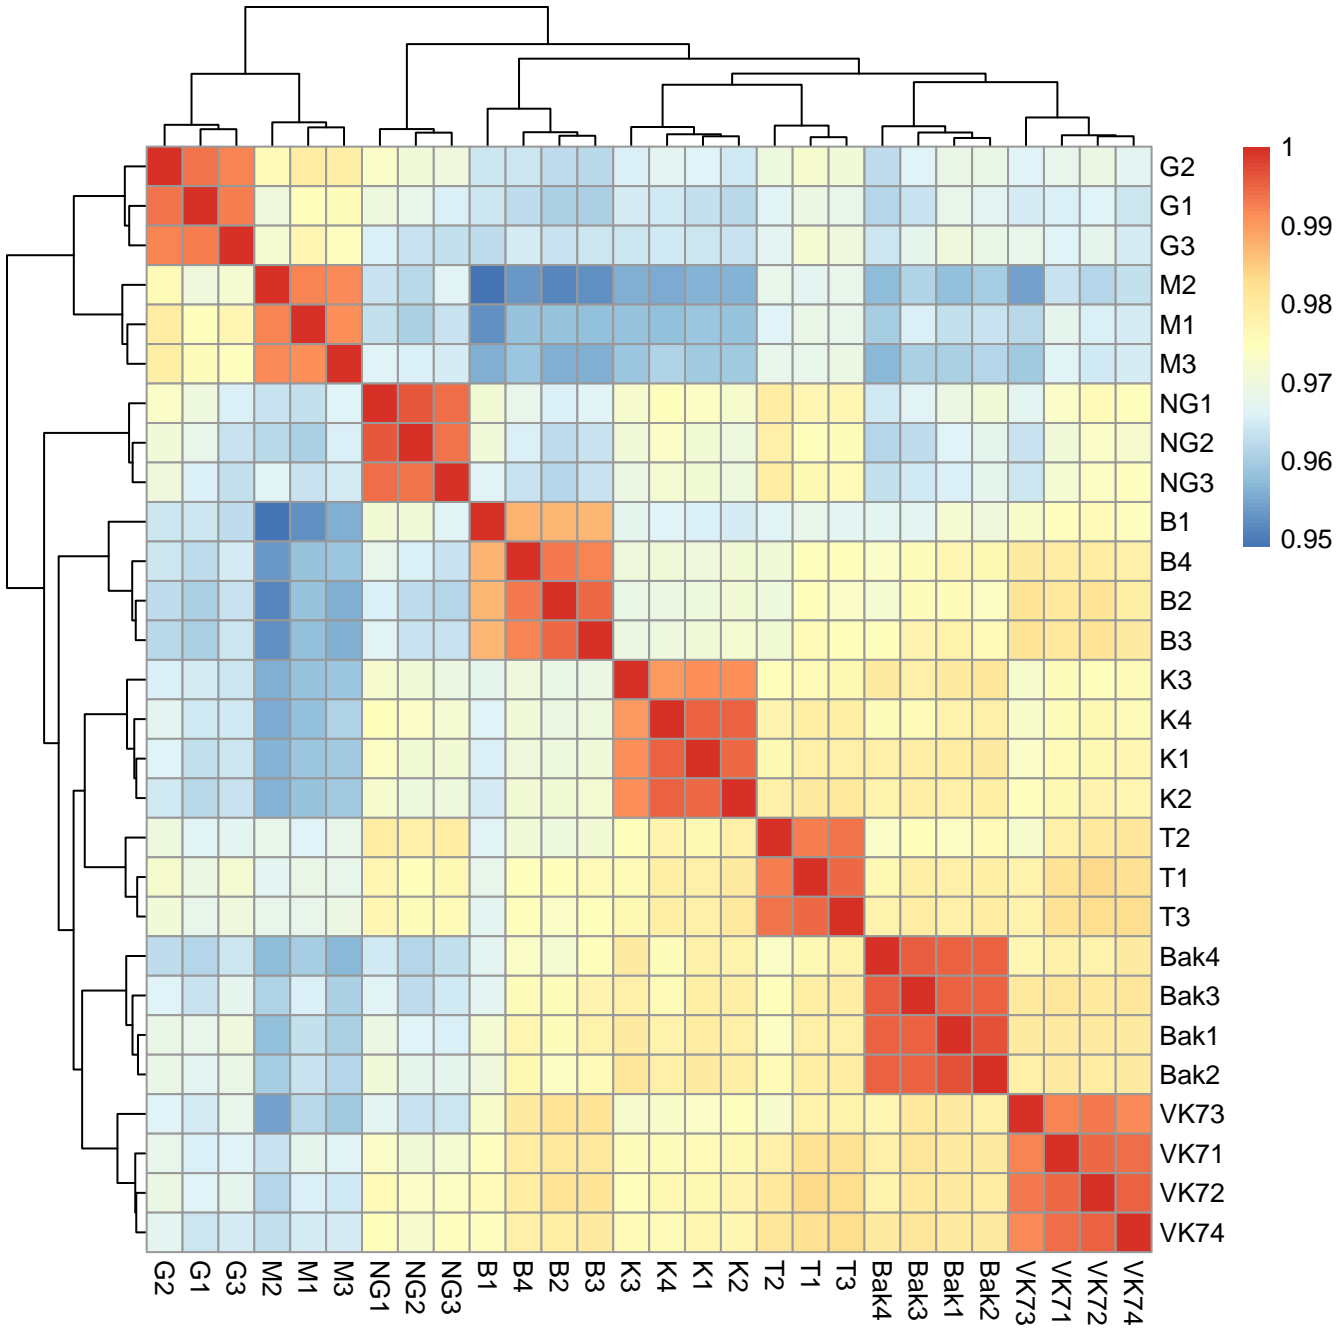

Supplement: s1 [file s1]

# Other Pathways

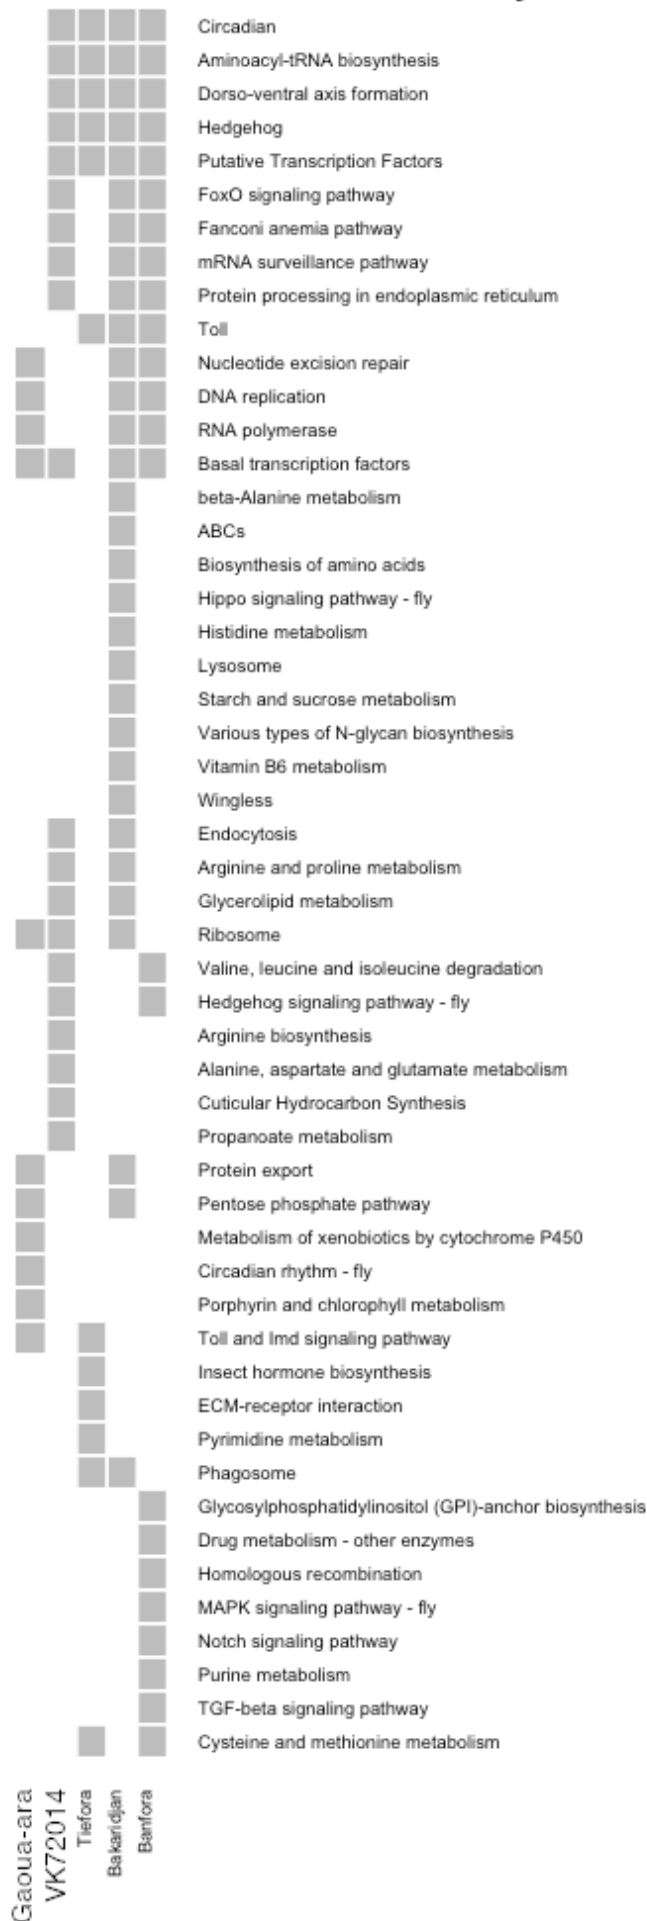

# GO Biological Process

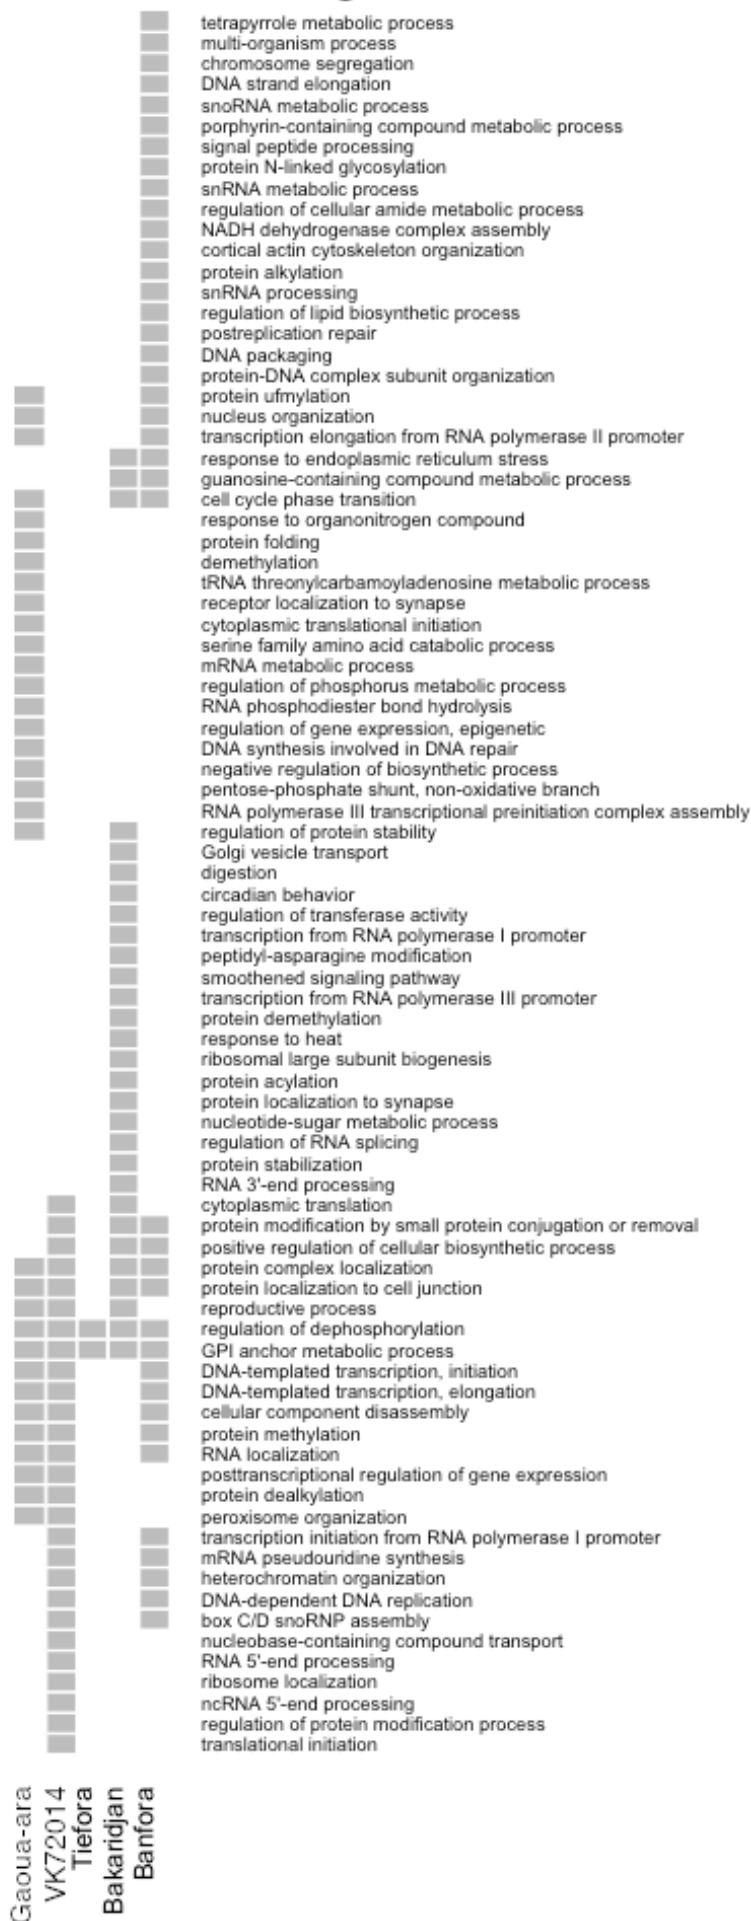

# GO Cellular Component

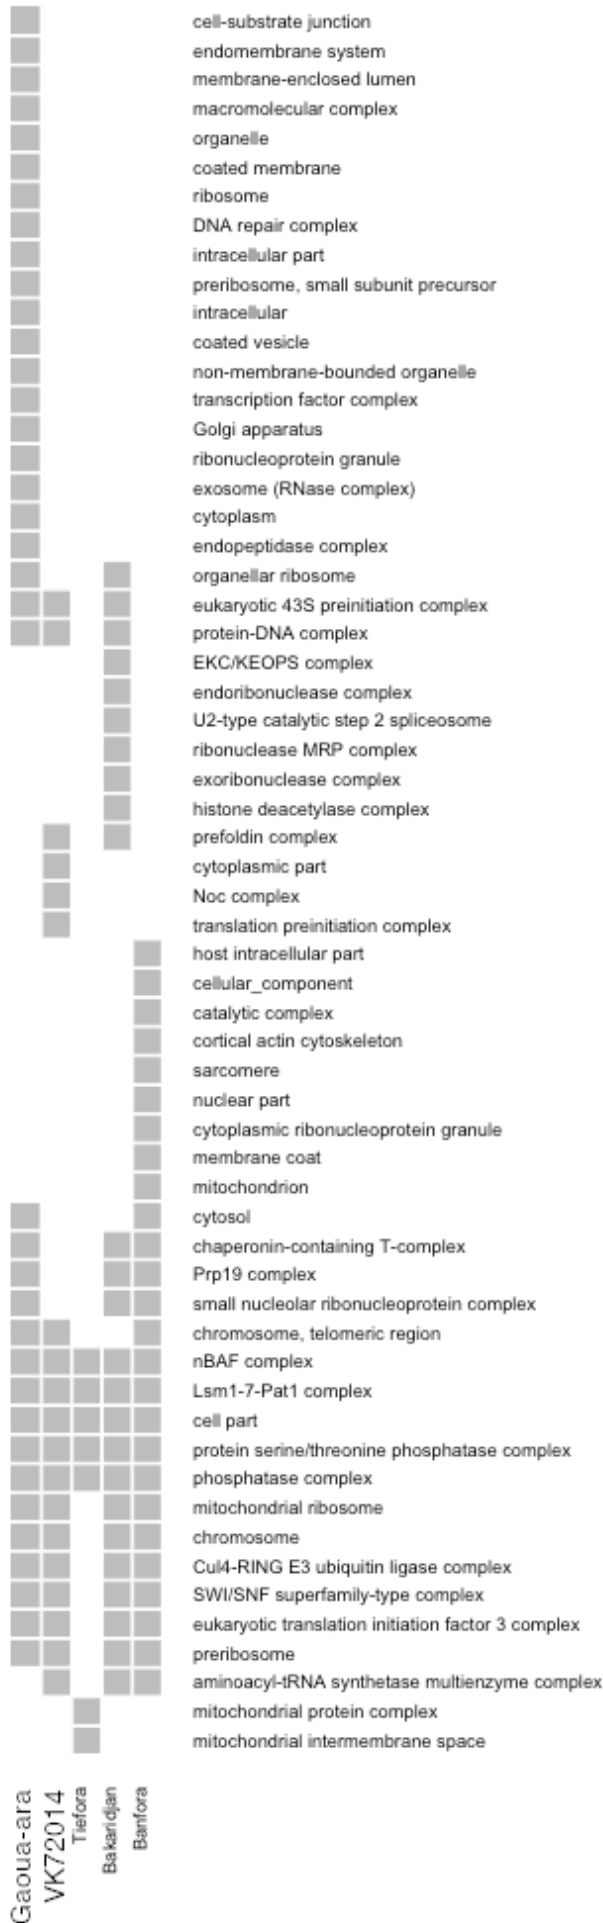

# GO Molecular Function

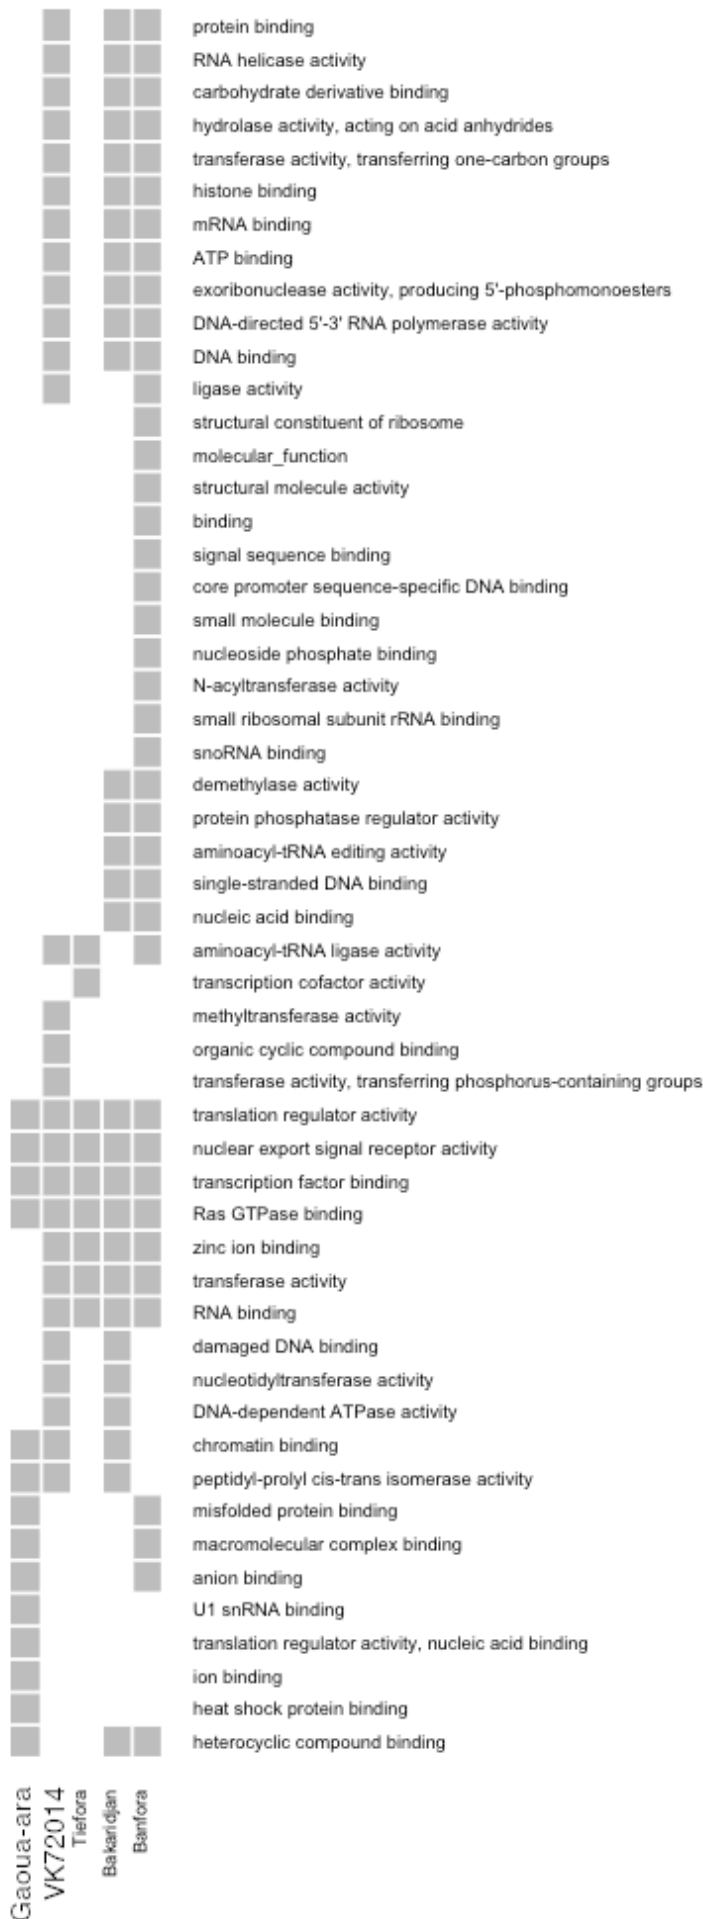

Supplement: s1 [file s1]
